# Supplementary material
Source: PubMed Central journal article supplement (PMC7173557)
Supplement: NIHMS1569352-supplement-1.pdf [file NIHMS1569352-supplement-1.pdf]

## **Inventory of Supplemental Information**

### **Supplemental Figures**

**Figure S1. Related to Figure 1**

**Figure S2. Related to Figure 2**

**Figure S3. Related to Figure 2**

**Figure S4. Related to Figure 3**

**Figure S5. Related to Figures 4 and 5**

**Figure S6. Related to Figures 5 and 6**

**Figure S7. Related to Figure 6**

**Table S1. Related to Figure 1**

**Table S2. Related to Figure 2**
